# 1 **Community vulnerability to epidemics in Nepal: A high-resolution** 2 **spatial assessment amidst COVID-19 pandemic**

3 **Laxman Khanal<sup>1</sup> | Binod Kumar Paudel<sup>2</sup> | Bipin Kumar Acharya<sup>31</sup>**

4 <sup>1</sup> Central Department of Zoology, Institute of Science and Technology, Tribhuvan University,  
5 Kathmandu, Nepal

6 <sup>2</sup> Communication University of China, Beijing, PRC

7 <sup>3</sup> Department of Epidemiology, School of Public Health, Sun Yat-Sen University, Guangzhou,  
8 China

9 \* **Correspondence:** acharya@mail.sysu.edu.cn

## 10 **Abstract**

11 The coronavirus disease 19 (COVID-19), the biggest health problem at present, doesn't have  
12 uniform transmission and severity among the countries and communities therein. Knowledge  
13 of community vulnerability to the disease would facilitate interventions aimed at transmission  
14 control by the efficient deployment of available limited resources. Therefore, we assessed  
15 spatial variations and heterogeneity of disease vulnerability among the population in 753  
16 municipal units of Nepal. We collected geospatial indicators representing the domain of  
17 socioeconomic inequalities, population dynamics, heterogeneity in accessibility and the  
18 information related to underlying health condition which potentially affect the severity of  
19 COVID-19 transmission. Those indicators were assembled to create three vulnerability indices  
20 using Geographic Information System (GIS); Social Vulnerability Index (SVI),  
21 Epidemiological Vulnerability Index (EVI) and a composite of the two- Social and  
22 Epidemiological Vulnerability Index (SEVI). The indicators were scaled to a common  
23 measurement scale and spatially overlaid via equally weighted arithmetic mean. The indices  
24 were classified into five level of risk and the municipal units and the population within  
25 vulnerabilities classes were quantified and visualized in the map. The index output indicated  
26 high vulnerability to epidemics in megacities like Kathmandu, Pokhara, Bharatpur, etc.;

---

NOTE: This preprint reports new research that has not been certified by peer review and should not be used to guide clinical practice.

27 developing cities especially in the Province No 2; and, municipal units of Karnali and  
28 Sudoorpushchim provinces. Additionally, some other municipalities such as Dhulikhel,  
29 Beshishahar, Tansen etc. which have a higher prevalence of pulmonary and cardiovascular  
30 disorders are highly vulnerable. The SVI indicated that 174 municipal units and 41.5%  
31 population is highly vulnerable. The EVI identified 55 municipal units and 40.7% of the total  
32 population of the country highly vulnerable to COVID-19. The SEVI accounted that disease  
33 vulnerability is high in 105 municipal units and 40% population of Nepal. The vulnerability  
34 indices created are means for different tiers of the existing government in federal system of  
35 Nepal for prioritization and improved planning for disease intervention especially in highly  
36 vulnerable municipal units where the COVID-19 transmission could have high severity.

37 **Keywords:** COVID-19, Epidemics, Municipal units, Nepal, Vulnerability mapping

## 38 1 | Introduction

39 Coronavirus disease 2019 (COVID-19) is a zoonotic disease caused by an RNA virus known  
40 as severe acute respiratory syndrome coronavirus 2 (SARS-CoV-2) reported from Wuhan,  
41 China in December 2019 (Huang et al. 2020). The World Health Organization (WHO) has  
42 declared the disease (COVID-19) a Public Health Emergency of International Concern  
43 (PHEIC) on 31<sup>st</sup> January 2020 (WHO 2020a). The COVID-19 pandemic, as of 25<sup>th</sup> June 2020,  
44 has spread exponentially to 215 countries, areas and territories, infecting 9,296,202 people and  
45 causing over 479,133 deaths (WHO 2020b). The mortality rate of the disease has been 5.15 per  
46 thousand infections. The intensity of its spread and the rate of mortality is not even among the  
47 spatial extents like continents, countries and geographical areas such as counties; communities,  
48 age-groups and sexes (Baud et al. 2020, Wadhwa et al. 2020, WHO 2020b). Higher rate of  
49 transmission and mortality have been recorded from the areas of dense settlement and heavy  
50 flow of people. About 80% of people with COVID-19 have mild or asymptomatic disease,  
51 therefore, symptom-based control is unlikely to be sufficient (Anderson et al. 2020, WHO  
52 2020a). The basic reproduction number ( $R_0$ ) of COVID-19, i.e. the mean number of secondary  
53 cases generated by one primary case when the population is largely susceptible to infection,  
54 had a value of about 2.5 in the earlier days of outbreak (Liu et al. 2020) that has substantially  
55 been lowered with the impose of social distancing measures (Rothan & Byrareddy 2020). The  
56 greater the reduction in transmission, the longer and flatter will be the epidemic curve; for

57 which early self-isolation and social distancing are the keys. Despite rigorous global efforts,  
58 COVID-19 is continuously spreading across the world causing significant illness and death  
59 (WHO 2020b). No vaccine or effective antiviral drug is likely to be available soon as the  
60 process will take time (Anderson et al. 2020).

61 Severity of a pandemic is not uniform in all societies (Wadhwa et al. 2020). Social vulnerability  
62 theory posits that “societal inequalities exist based on class, race, ethnicity, gender, age, health,  
63 abilities, etc.” (Cannon 1994). Differences in socioeconomic factors impose different degree  
64 of impacts from hazards (Mwarumba 2017). Vulnerability includes exposure to detrimental  
65 environmental or social strains, susceptibility to those strains, and the capacity to adapt (Adger  
66 2006). Being more specific to a disease, vulnerability is the elevated exposure to infection;  
67 increased susceptibility to the disease including its complications, hospitalizations, and death;  
68 and lack of access to health care (Frankel 2011). People living with smallest number of choices  
69 and forced lives from poverty, gender and ethnic discrimination, physical disability, limited  
70 employment opportunities, and other forms of domination are the most vulnerable to such  
71 disasters (Cannon 1994). Severity indices of the community to the disease could explain  
72 possible relationships underlying the temporal and spatial aspects of its diffusion.

73 The severity of COVID-19 is higher in areas of higher population density (Coccia 2020,  
74 Rocklöv & Sjödin 2020, Wadhwa et al. 2020) and their movement (Tuite et al. 2020, You et  
75 al. 2020). Higher population density lowers the efficacy of social distancing and adds  
76 complications in the contact tracing of the COVID-19 patients that ultimately increases the  $R_0$   
77 (Anderson et al. 2020, Rocklöv & Sjödin 2020). The disease incidence in children seems to be  
78 lower than in the rest of the population (Sominsky et al. 2020, Wu & McGoogan 2020), so is  
79 the disease accounted mortality rate (Dong et al. 2020). Pre-existing chronic medical conditions  
80 such as chronic obstructive pulmonary disease (COPD), cardiovascular diseases such as high  
81 blood pressure, diabetes etc. may predispose adults to more severe outcomes of the disease  
82 (Fang et al. 2020, Yang et al. 2020, Zheng et al. 2020). The innate immune mechanism is less  
83 efficient in elderly people that makes them more vulnerable to severe outcomes of infectious  
84 diseases (Boe et al. 2017). Communities having dense population dominated by the elderly  
85 people with compromised immunity presumably have higher vulnerability to the COVID-19  
86 disease.

87 In response to the COVID-19 pandemic, most of the countries across the globe have imposed  
88 lockdown, due to which a large number of people have lost their job. Such people rush to their  
89 country and hometown, legally or illegally, without proper precautions. The movement of large  
90 groups of unprotected, non-immune, physically weakened and possibly infected people  
91 between different zones can increase the vulnerability of migrants and their host community to  
92 the pandemic (Bates et al. 2004). Poverty is one of the major determinants of the disease  
93 vulnerability as poor people have limitations in resource mobility and disease treatment. Hence,  
94 poverty is known as the “carrier status” of disease (Semenza & Giesecke 2008). Delays in  
95 diagnosis and treatment of epidemics are associated with worse transmission, morbidity and  
96 mortality (Bates et al. 2004). Additionally, poverty associated illiteracy leads to  
97 disproportionate misinformation and miscommunication among individuals with less access to  
98 information channels, who fail to maintain necessary precautions against the disease.  
99 Undernutrition and lack of sanitation can worsen the situation of the pandemic by boosted  
100 diffusion and higher mortality. Health facilities are not adequate and accessible to all people in  
101 developing countries. Inequalities in geographic accessibility to healthcare even in developed  
102 countries like the United States have been documented to cause negative health outcomes for  
103 epidemics (Mollalo et al. 2020). Inability to access health care is a major obstacle to initiation  
104 of early treatment and prevent the transmission dynamics. Timely diagnosis, isolation and  
105 treatment is crucial for the control of pandemics like COVID-19 (Ji et al. 2020). Because almost  
106 all of the medical facilities meeting basic requirements for COVID-19 identification and  
107 treatment are in the city areas, travel time to hospitals and cities can be one of the important  
108 determinants of the vulnerability.

109 Large number of literatures have surged in the short period of time after COVID-19 outbreak,  
110 however, most of them are from the medical sciences using clinical and serological data. For  
111 the proper management and control of such pandemics it is equally important to know the  
112 transmission dynamics and identify the vulnerable group of people. Geospatial analysis using  
113 socioeconomic, demographic and geophysical data would be helpful to restrain the disease.  
114 Geographic information system (GIS) is an essential tool to examine the spatial distribution of  
115 infectious diseases (Acharya et al. 2018, Kang et al. 2020). However, a limited number of GIS-  
116 based studies have been published since the initial outbreak of COVID-19 (Kamel Boulos &  
117 Geraghty 2020, Kang et al. 2020, Macharia et al. 2020, Mollalo et al. 2020, Sarwar et al. 2020).

118 Assessment of the disease risk level is important for preparedness and response. It is vital to  
119 explain the determining factors of the transmission dynamics of this highly infectious disease  
120 for designing strategies to control diffusion, empowering health policy with economic, social  
121 and environmental interventions (Coccia 2020). However, real risk of infection and death  
122 depends on a number of factors including domain of population structure, socioeconomic  
123 heterogeneity and underlying health condition of population. By the date of 25<sup>th</sup> June 2020,  
124 COVID-19 has accounted a total of 11,162 infections and 26 deaths from 76 of the 77 districts  
125 within Nepal territory (MoHP 2020). Most of those cases of the disease in Nepal are among  
126 mass return migrants from India, China and other areas, except few suspected community level  
127 transmission cases in Birgung, Nepalgunj and Udaypur (Tharu et al. 2020). If the community  
128 level transmission of COVID-19 or other epidemics starts, it is important to identify the most  
129 vulnerable communities and areas such that available limited resources could be efficiently and  
130 timely deployed in those priority zones. This knowledge would facilitate interventions aimed  
131 at transmission control and patient care, minimizing the collective and individual burden of the  
132 pandemic. Therefore, we aimed to explore- i) demographic and health resource accessibility  
133 inequities; ii) socioeconomic inequities; iii) disease prevalence inequities; and, iii) severity  
134 indices to epidemics among 753 municipal units of Nepal. We used demographic,  
135 socioeconomic and spatial data, and GIS tools to identify the Social Vulnerability Index (SVI),  
136 Epidemiological Vulnerability Index (EVI) and a composite of the two, the Social-  
137 Epidemiological Vulnerability Index (SEVI).

## 138 **2 | Methods**

### 139 **2.1 | Study area**

140 This study was conducted covering entire 753 municipal units in Nepal. The municipal units  
141 include four categories: six metropolitan cities, 11 sub-metropolitan cities, 276 municipalities  
142 and 460 rural municipalities. These units are third tier of government in the federal structure of  
143 Nepal. Administratively these municipal units come under third hierarchy after the province  
144 (n=7) and district (n=77) units in Nepal.

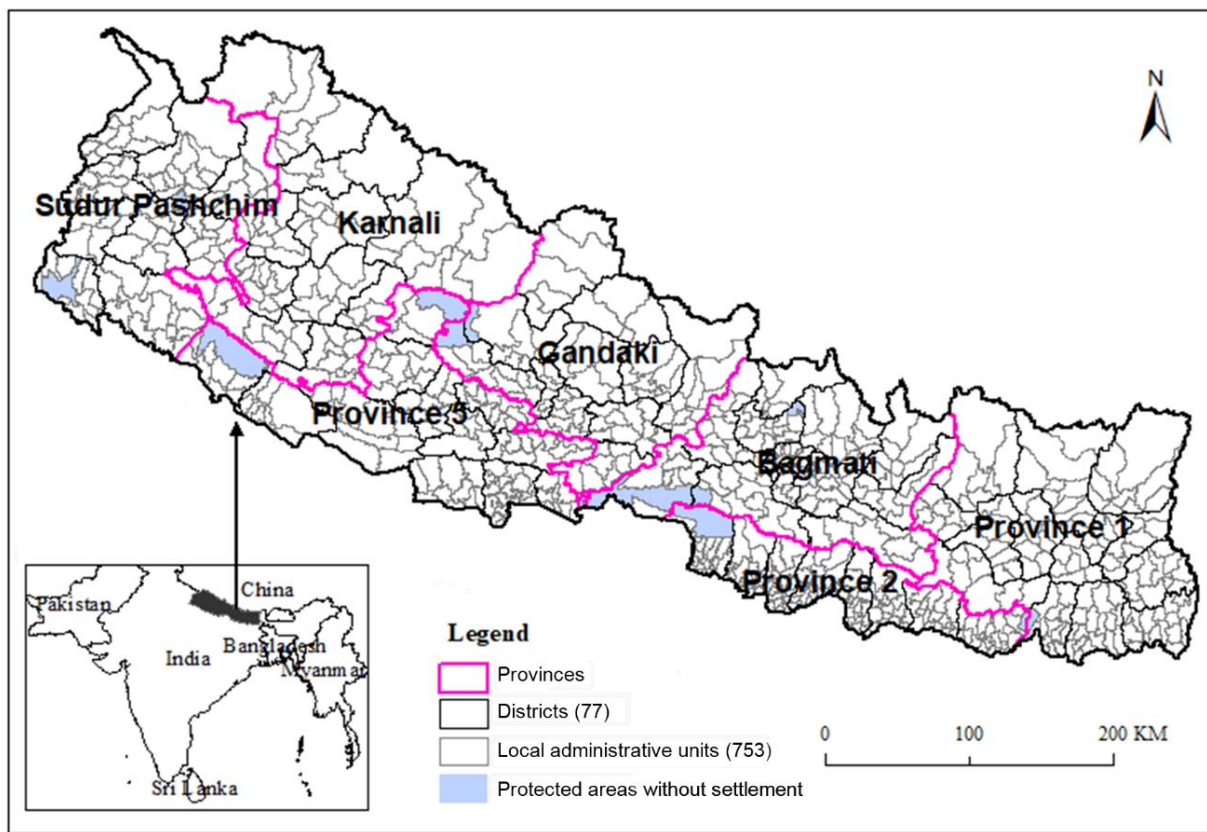

145

146 **Figure 1.** Map of Nepal showing 753 municipal units under 77 districts and seven provinces.

## 147 **2.2 | Data collection and processing**

148 Based on the previous findings and availability of freely accessible data sources, we collected  
149 14 relevant data layers for this assessment covering four broad domains of vulnerability- socio  
150 economic inequalities (Mollalo et al. 2020), population dynamics (Wadhera et al. 2020), access  
151 to health services (Rader et al. 2020,2020, Smith & Judd 2020, Wadhera et al. 2020) and  
152 underlying health condition such as prevalence of hypertension, diabetes, asthma and COPD.

### 153 **Socioeconomic inequalities data**

154 Proportion of household with no toilet facility, proportion of households with access to  
155 improved water sources, literacy and prevalence of stunting among children were five  
156 indicators related with socioeconomic inequalities which were collected as gridded raster layers  
157 from demographic and health survey (DHS) 2016 (<https://www.dhsprogram.com>). These raster  
158 surfaces were generated using geostatistical modeling based DHS indicators and several  
159 relevant environmental covariates (Mayala et al. 2019). In addition, poverty status raster layer  
160 generated using geostatistical method-based household wealth quantile data of DHS and



161 relevant environmental covariates was also retrieved from the worldpop geoportal  
162 (<https://www.worldpop.org/>). Then, mean values of these layers were extracted using the zonal  
163 statistics function of the spatial analyst tool of ArcGIS 10.5.

164

### 165 **Demographic and accessibility data**

166 Population density and elderly population of age above 60 years; two demographic indicators  
167 used in the study were retrieved for the year of 2020 from the worldpop geoportal  
168 (<https://www.worldpop.org/>) in gridded format. The mean value of these layers was  
169 summarized in municipal unit using zonal statistics tool of ArcGIS 10.5. To normalize the  
170 distribution of population, we took log population density instead of direct population density.  
171 Proportion of elderly population were computed by dividing elderly population with total  
172 population and expressed in percentage. For the accessibility, we used two indicators;  
173 accessibility to urban center and accessibility to health facilities. For urban accessibility, travel  
174 time to nearest urban center with population higher than 50,000 were retrieved from Weiss et  
175 al. (2018) and extracted in the extent of Nepal while accessibility to health facilities was  
176 computed by ourselves. We collected hospital location data from open access Humanitarian  
177 Data Exchange Portal (<https://data.humdata.org/dataset/nepal-health-facilities-cod>), landcover  
178 map of 2010 from ICIMOD geoportal (Uddin et al. 2015), road from open street map  
179 (<https://www.openstreetmap.org/>) and SRTM DEM from consortium for spatial information  
180 geoportal (<http://srtm.csi.cgiar.org/srtmdata/>) for this purpose. We used AccessMod version  
181 5.0 (Ray & Ebener 2008) to process these datasets and compute the travel time. Median travel  
182 time to nearest health facilities was calculated as a cost distance depending on specific cost  
183 values for different land cover properties and considering topographical barriers. The median  
184 value of travel time raster and urban accessibility raster were summarized in local unit level  
185 using the zonal statistics tools of ArcGIS 10.5.

### 186 **Epidemiological data**

187 Reported number of cases for four major non-communicable diseases: hypertension, diabetes,  
188 asthma and COPD in Out Patient Department (OPD) services of different hospitals aggregated  
189 in municipal unit were downloaded from Health Management Information System (HMIS) web  
190 portal (<https://dohs.gov.np/ihims-raw-data/>) first. Similarly, municipal unit wise population of  
191 Nepal was also retrieved from Central Bureau of Statistics ([https://cbs.gov.np/population-of-  
192 753-local-unit/](https://cbs.gov.np/population-of-753-local-unit/)). Then, both the datasets were linked to 753 municipal units in Arc GIS. Using

193 the GeoDa software (Anselin et al. 2006), prevalence rate per thousand of population were  
 194 computed for all four diseases. Considering possible instability prevalence rate due to small  
 195 population, empirical Bayes smoothing was used based on K-nearest neighbored method  
 196 (Pringle 1996). The indicators used and their nature, data format, resolution and sources are  
 197 presented in the Table 1. The methodological workflow for this study is summarized in  
 198 graphical form in the Figure 2.

199 **Table 1.** Demographic and socioeconomic inequality data used in the study and their sources

| Indicators                    | Description of Indicators                                      | Data Format      | Resolution     | Year/Source       |
|-------------------------------|----------------------------------------------------------------|------------------|----------------|-------------------|
| <b>Toilet facility</b>        | Proportion of households with no toilet facility               | Raster           | 1*1 km         | 2016 <sup>a</sup> |
| <b>Dirking water facility</b> | Proportion of households with access to improved water sources | Raster           | 1*1 km         | 2016 <sup>a</sup> |
| <b>Malnutrition</b>           | Prevalence of stunting among children                          | Raster           | 1*1 km         | 2016 <sup>a</sup> |
| <b>Literacy</b>               | Percentage of people are literate                              | Raster           | 1*1 km         | 2016 <sup>a</sup> |
| <b>Poverty</b>                | Wealth Index                                                   | Raster           | 1*1 km         | 2016 <sup>b</sup> |
| <b>Log Population density</b> | Total population per unit area                                 | Raster           | 1*1 km         | 2016 <sup>b</sup> |
| <b>Elderly population</b>     | Percentage of the population aged 60+                          | Raster           | 1*1 km         | 2016 <sup>b</sup> |
| <b>Access to hospitals</b>    | Median travel time to nearest hospital                         | Raster           | 100*100 m      | 2016 <sup>c</sup> |
| <b>Access to urban areas</b>  | Travel time to the nearest urban center with at ≥ 5000 people  | Raster           | 1*1 km         | 2015 <sup>d</sup> |
| <b>Hypertension</b>           | Prevalence of hypertension per 1000                            | Aggregated Count | municipal unit | 2018 <sup>e</sup> |
| <b>COPD</b>                   | Prevalence of COPD per 1000                                    | Aggregated Count | municipal unit | 2018 <sup>e</sup> |
| <b>Diabetes</b>               | Prevalence of diabetes per 100                                 | Aggregated Count | municipal unit | 2018 <sup>e</sup> |
| <b>Bronchial Asthma</b>       | Prevalence of asthma per 1000                                  | Aggregated Count | municipal unit | 2018 <sup>e</sup> |

**Notes:** a: <https://www.dhsprogram.com/>; b: <https://www.worldpop.org/>; c: Our own computation as explained above; d: <https://malariaatlas.org/research-project/accessibility-to-cities/>; and e: <https://dohs.gov.np/ihims-raw-data>



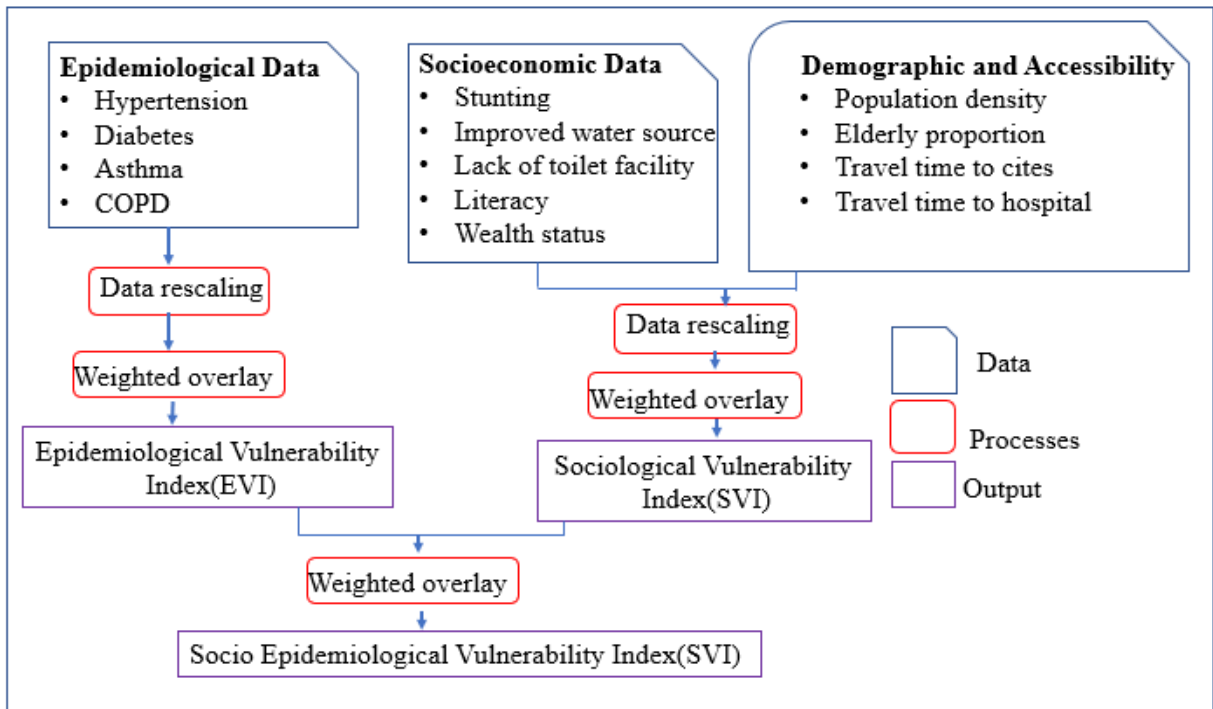

200

201 **Figure 2.** Methodological workflow for identification of community vulnerability

202 **2.3 | Vulnerability indices computation**

203 As these potential indicators have different scales with different minima and maxima values,  
 204 in the second step, all indicators were rescaled to a common scale ranging their values from 0  
 205 with least vulnerable to 100 most vulnerable to make values comparable using the equation (1).  
 206 During this normalization process the direction of the indicators were also adjusted according  
 207 to whether the indicator contributes positively or negatively.

208 
$$Sclaed\ values = \left( \frac{X - X_{min}}{X_{max} - X_{min}} \right) * (T_{max} - T_{min}) + T_{min} \dots \dots \dots (1)$$

209 Where X denotes the value to be scaled;  $X_{max}$ ,  $X_{min}$  maximum and minimum values in the  
 210 original range; and  $T_{max}$  and  $T_{min}$  maximum (100) and minimum (0) values to be scaled  
 211 respectively.

212 We constructed three vulnerability indices: Social Vulnerability Index (SVI), Epidemiological  
 213 Vulnerability Index (EVI) and a composite of the two, the Social-Epidemiological  
 214 Vulnerability Index (SEVI) following the approach of (Macharia et al. 2020). We chose equally  
 215 weighted arithmetic mean (Sullivan & Meigh 2006) for overlaying these indicators. However,  
 216 in a reality, different indicators may affect vulnerability differently, we chose this method due

217 to limited knowledge on relative contribution of these variables on community vulnerability of  
218 COVID-19. For the SVI, nine factors representing the socioeconomic inequalities,  
219 demographic dynamics and heterogeneity in accessibility were considered while for the EVI,  
220 prevalence of four chronic diseases were considered. The actual vulnerability was computed  
221 by integrating the both.

222 Finally, all three indices were visualized in ArcGIS environment by grouping them into five  
223 levels of risk: very low, low, moderate, high and very high, based on the natural junk  
224 classification method (Jenks 1977). The advantage of this classification method is it identifies  
225 "natural" groups within the data by reducing the variance within classes and maximizing the  
226 variance between classes (Jenks 1977). While many vulnerability assessment approaches  
227 provide tabular outputs, visualization is an important part of vulnerability assessment because  
228 it allows users to gain a better grasp of the spatial distribution of high or low vulnerability. End-  
229 users, and especially those without a technical background, can easily see and interpret the  
230 index output in this format compared to other formats (Dickin et al. 2013).

## 231 **3 | Results**

### 232 **3.1 | Demographic and accessibility inequities**

233 Among 753 municipal units of Nepal, municipalities including mega cities like Biratnagar,  
234 Bharatpur, Kathmandu, Pokhara, Butwal, Nepalgunj, Dhangadhi, etc. have high population  
235 density (above 809, up to 63652 individuals per square kilometer), much higher than the  
236 average national value (203 per square kilometer) (Fig. 3). Age wise structure of the population  
237 reveals that majority of municipal units in Bagmati and Gandaki provinces have higher  
238 proportion of elderly population (above 9.4% of the total population aged over 60 years) than  
239 rest of the municipalities and rural municipalities. Districts from the highland areas of Province  
240 No. 1, Karnali province and Sudoorpashchim province have highest required travel time to the  
241 hospital and cities.

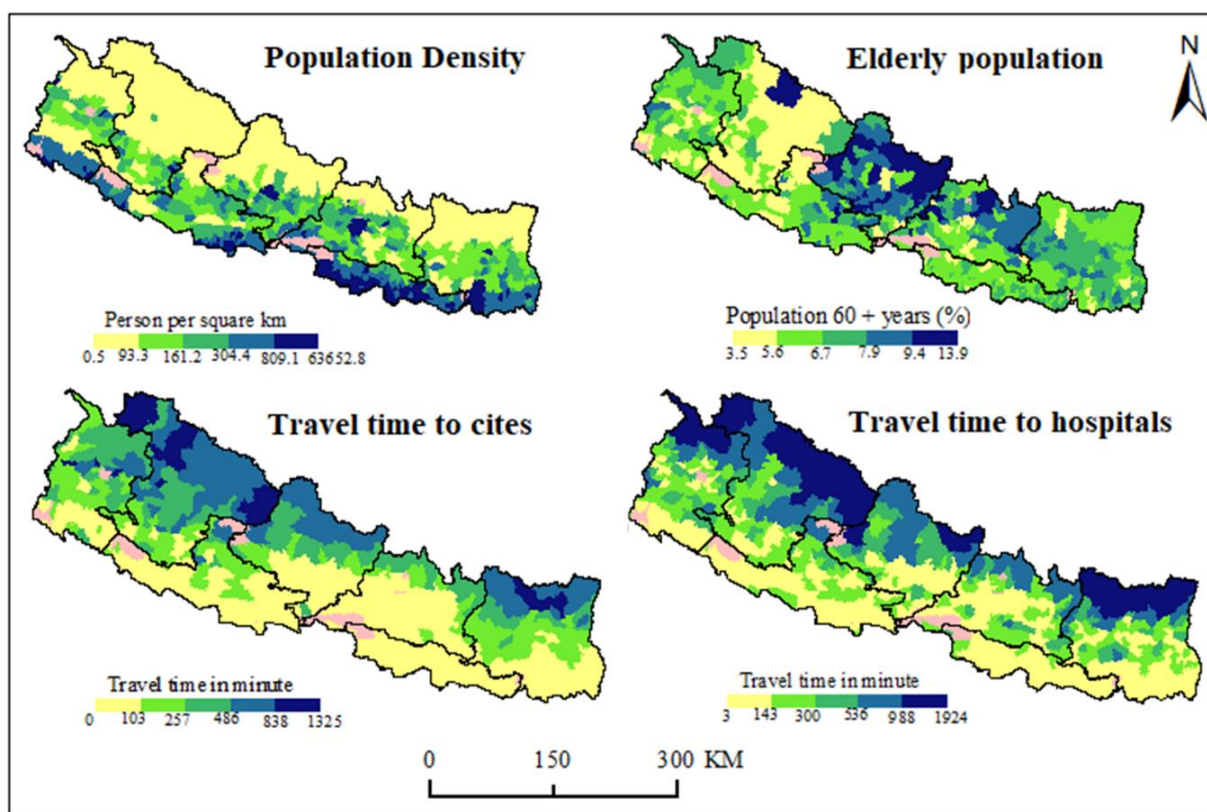

242  
243 **Figure 3.** Spatial distribution of demographic and accessibility factors in municipal units of Nepal.

### 244 3.2 | Socioeconomic inequities

245 Literacy rate is low in Rukum (east) district of Province No 5, sparsely populated some  
246 Himalayan districts, and densely populated districts of the Province No. 2 (Fig. 4). Both the  
247 poverty and stunting indices are above the national average values in Himalayan areas,  
248 especially in Karnali province and Sudoorpashchim province. Drinking water facility is poor  
249 in some pocket areas including Rukum (east) district. Coupled with high population density  
250 and illiteracy, the Province No. 2 with almost 2/3<sup>rd</sup> population without the toilet facility has the  
251 worst situation of sanitation facilities.

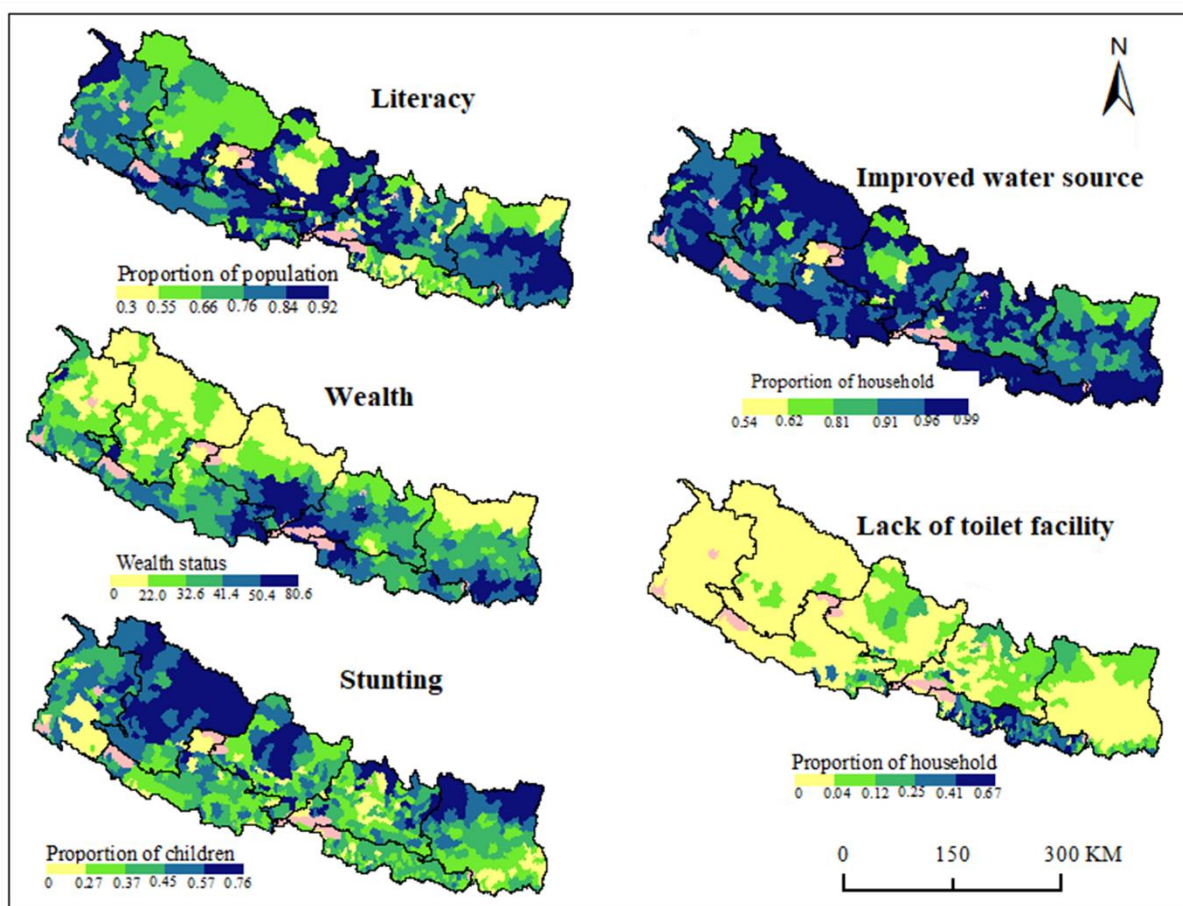

252  
253 **Figure 4.** Spatial distribution of the socioeconomic inequalities among the municipal units of Nepal

### 254 3.3 | Disease prevalence inequities

255 Prevalence of the diseases among the population is not uniform among the municipal units of  
256 Nepal (Fig. 5). The population in growing cities like Dhulikhel, Tansen etc. have the highest  
257 hypertension prevalence (above 200 individuals per 10,000). Asthma is more prevalent (35-57  
258 per 10,000 individuals) among the districts of Karnali province (Kalimati, Palata, Kharpunath,  
259 Sarkegad Thulibheri, etc. RMs), Sudoorpashchim province (Amargadhi, Ajaymeru,  
260 Nawadurga from Dadeldhura district; Jayaprithivi RM from Bajhang; etc.), and some cities  
261 like Beshishahar in Lamjung, Dhorpatan in Baglung, etc. The chronic obstructive pulmonary  
262 disease (COPD) has higher prevalence among the population of Dhulikhel (121.9 per 10,000),  
263 Amargadhi (77 per 10,000), Sarkegad (65 per 10,000), Tansen (62 per 10,000), Bhimeswor  
264 (61 per 10,000), etc. Diabetes is more prevalent in city areas such as Dhulikhel (122.4 per  
265 10,000), Tansen, Siddharthnagar, Bharatpur, Biratnagar, Pokhara, Birtamod (50.4 per 10,000),  
266 etc.



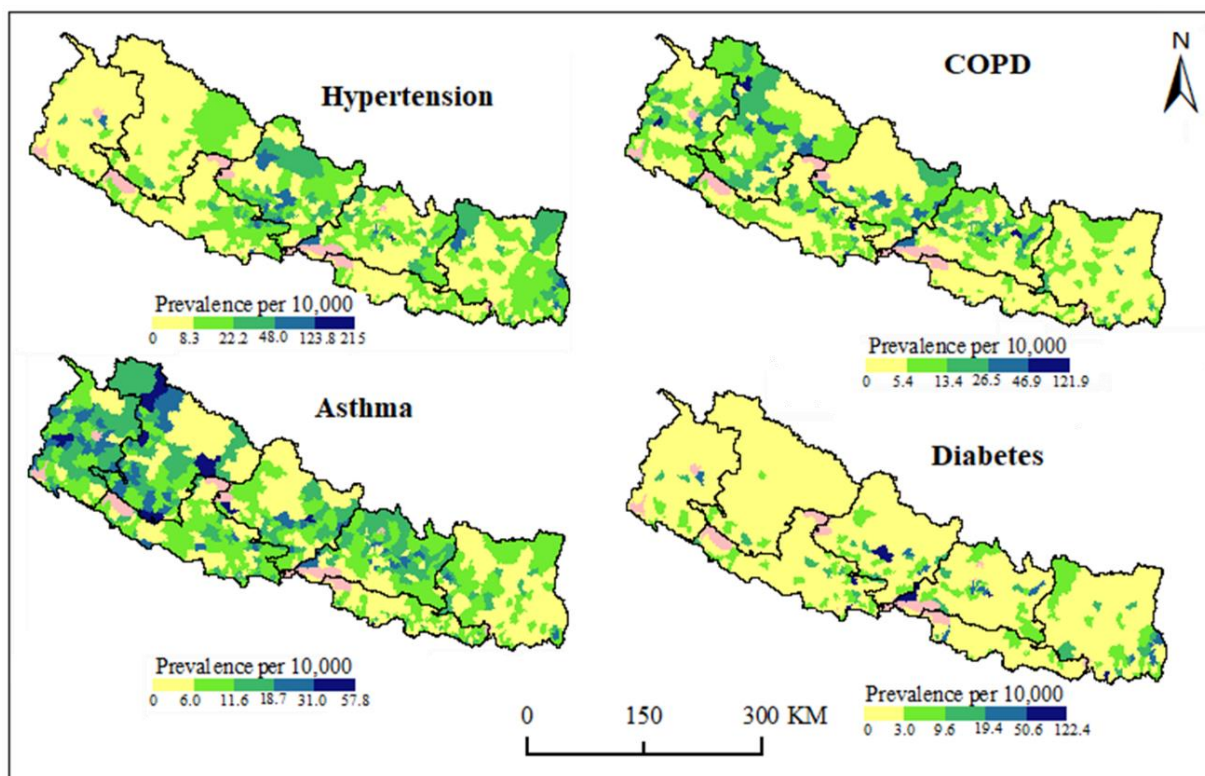

267  
268 **Figure 5.** Spatial distribution of disease prevalence inequalities among the municipal units of Nepal

### 269 3.4 | Vulnerability indices to the disease

270 The spatial assemblage of the social vulnerability index (SVI) was heterogeneous across 753  
271 municipal units of Nepal (Fig. 6). It revealed that 44 (5.8%) municipal units (six municipalities  
272 and 38 rural municipalities) have very high vulnerability, however, population wise, 38.57%  
273 (10.7 million) of the total population of Nepal falls under highly vulnerable category (Table 2).  
274 Municipal units mainly in highland areas of eastern Nepal from Taplejung, Solukhumbu,  
275 Sankhuwasabha etc., from western Nepal such as Rukum, Dailekh, Bajura, Jajarkot, Dolpa etc.  
276 and Saptari district of Province No. 2 are among the highly vulnerable. The least vulnerable  
277 municipal units (149/753) are mainly located in better developed areas such as Jhapa, Morang,  
278 Sunsari, Kathmandu valley, Chitwan, Rupandehi, Dang, Kailali etc. Four metropolitan cities-  
279 Biratnagar, Lalitpur, Kathmandu and Bharatpur; three sub-metropolitan cities – Dharan, Itahari  
280 and Kalaiya; and 66 municipalities come under the category of very low SVI.

281

282 **Table 2.** Spatial and demographic distribution of different categories of the vulnerability indices in  
 283 Nepal

| Index | Vulnerability | Breaking values | No. of municipal units | Population  | Population %       |
|-------|---------------|-----------------|------------------------|-------------|--------------------|
| SVI   | Very low      | <24.627         | 149                    | 3325105.97  | 11.940             |
|       | Low           | 24.627-28.977   | 253                    | 8204832.287 | 29.463             |
|       | Moderate      | 28.977-34.052   | 177                    | 4751584.795 | 17.063             |
|       | High          | 34.052-40.662   | 130                    | 825717.334  | 2.965              |
|       | Very high     | >40.662         | 44                     | 10739891.37 | 38.567             |
|       | <b>Total</b>  |                 |                        | <b>753</b>  | <b>27847131.75</b> |
| EVI   | Very low      | <5.375518       | 293                    | 1722249.986 | 6.184              |
|       | Low           | 5.375-9.937     | 271                    | 10351395.43 | 37.172             |
|       | Moderate      | 9.937-17.206    | 134                    | 4422435.07  | 15.881             |
|       | High          | 17.206-32.128   | 46                     | 171922.22   | 0.617              |
|       | Very high     | >32.128         | 9                      | 11179129.05 | 40.145             |
|       | <b>Total</b>  |                 |                        | <b>753</b>  | <b>27847131.75</b> |
| SEVI  | Very low      | <15.872         | 189                    | 1599901.06  | 5.745              |
|       | Low           | 15.872-19.132   | 259                    | 9286506.011 | 33.348             |
|       | Moderate      | 19.132-23.316   | 200                    | 5813005.09  | 20.874             |
|       | High          | 23.316-30.451   | 90                     | 10887105.79 | 39.095             |
|       | Very high     | >30.451         | 15                     | 260613.806  | 0.936              |
|       | <b>Total</b>  |                 |                        | <b>753</b>  | <b>27847131.75</b> |

284 There was no distinct pattern on epidemiological vulnerability index (EVI) among the  
 285 municipal units of Nepal. The EVI identified nine municipal units as highly vulnerable,  
 286 however, demographically, 40.15% (11.18 million) of the country population came under this  
 287 category. Municipal units having high population density with higher prevalence of diseases  
 288 like asthma, diabetes, COPD and hypertension such as Dhulikhel, Tansen, Beshishahar,  
 289 Amarghadhi municipalities fell under the class of very high epidemiological vulnerability  
 290 index. Among five categories of the EVI, the highest number of municipal units (n= 293) fell  
 291 under the ‘very low’ but only 6.18% of the total population belonged to this group.



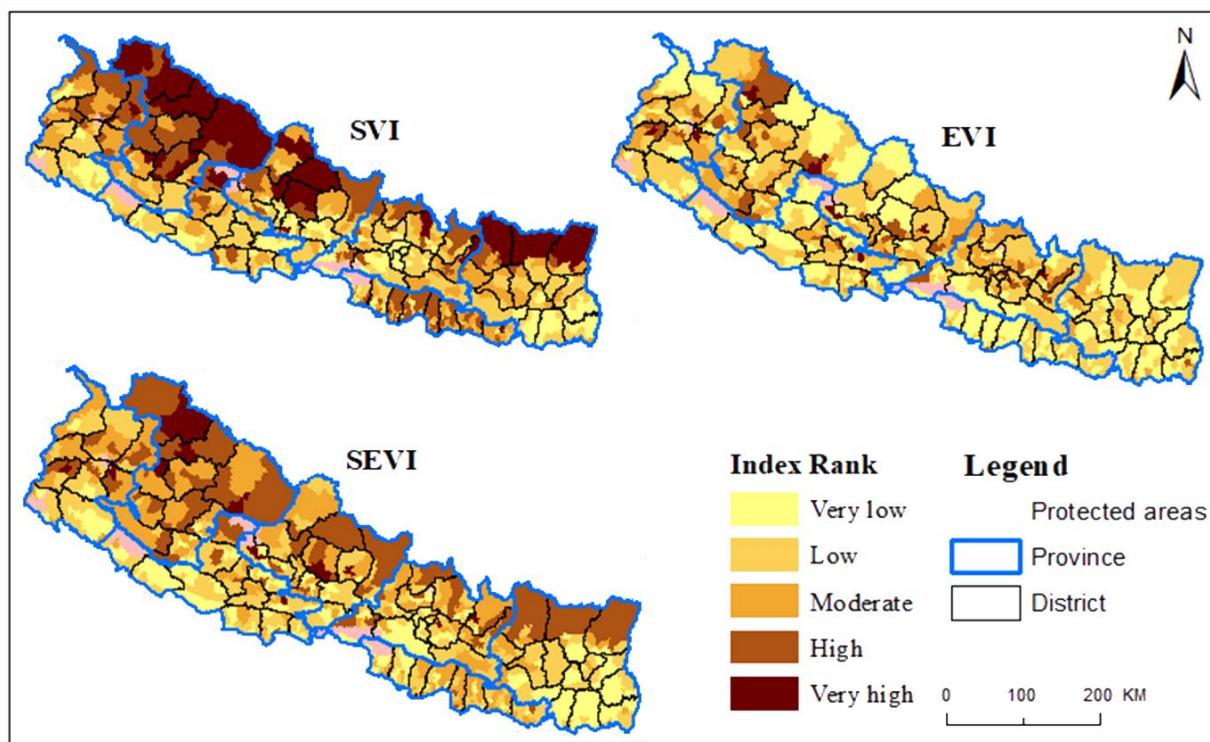

292

293 **Figure 6.** Geospatial arrangement of social vulnerability index (SVI), epidemiological vulnerability  
294 index (EVI) and social-epidemiological vulnerability index (SEVI), across 753 municipal units of Nepal  
295 grouped into five ranks.

296 The Social-Epidemiological Vulnerability Index (SEVI), a composite of the two (SVI and EVI)  
297 revealed that 15 municipal units of Nepal are under very high vulnerability of the disease. It  
298 included Pokhara Lekhnath metropolitan city, 10 municipalities (Besishahar, Thuli Bheri,  
299 Chhayanath Rara, Bhimeshwar, Dhulikhel, Gaur, Dhorpatan, Tansen, Sanphebagar and  
300 Amargadhi) and four rural municipalities from Karnali province (Palata, Chankheli,  
301 Kharpunath and Sarkegad). The SEVI revealed high vulnerability of 90 municipal units of  
302 Nepal including Bharatpur metropolitan city, 28 municipalities more abundantly from Karnali  
303 and Sudoorpushchim provinces; and 61 rural municipalities from all over Nepal.  
304 Demographically, about 40% (11.15 million) population (0.94% very high vulnerability and  
305 39.1% high vulnerability) is highly vulnerable to epidemics. A total of 189 municipal units fall  
306 under the category of 'very low' SEVI, which include Lalitpur metropolitan city, five sub-  
307 metropolitan cities (Dharan, Itahari, Hetauda, Kalaiya and Tulsipur), 70 municipalities and 113  
308 rural municipalities.

## 309 **4 | Discussion**

310 The corona virus disease 19 (COVID-19) has become a global pandemic and lacks the vaccine  
311 and antiviral drug till date (25<sup>th</sup> June 2020). For containing the disease within the lesser  
312 severity, it is important to know the level of vulnerability among the geographical units and the  
313 communities such that disease control interventions could be efficiently deployed to the highly  
314 vulnerable groups. Here, we present community-level vulnerability index to the epidemics for  
315 753 municipal units under 77 districts of 7 provinces in Nepal. The results could be valuable  
316 for the local government to effectively control the transmission dynamics of the COVID-19  
317 pandemic and other epidemics. Index based vulnerability assessment has been used in a number  
318 of diseases including COVID-19 (Dickin et al. 2013, DeCapprio et al. 2020, Macharia et al.  
319 2020, KC et al. 2020). The high vulnerability score can be described as a location where a  
320 higher percentage of COVID-19 cases would result in severe outcomes such as hospitalization  
321 or death as compared to a locality with a low vulnerability score.

322 The social vulnerability index (SVI) varied significantly among the municipalities and rural  
323 municipalities of Nepal as a result of a spatial variation of the underlying vulnerability  
324 indicators. The SVI identified the municipal units as highly vulnerable ones that have higher  
325 population density, greater proportion of the elderly population, larger illiteracy rate and longer  
326 travel time to the hospitals and cities. The rate of disease spread increases with human  
327 population density and it is consistent for vector borne, air borne as well as contact transmission  
328 diseases. Patterns of illness and death due to COVID-19 reflect urban social and economic  
329 geographies because poor people living in the high densities with low quality housing seem  
330 more affected (Ahmed et al. 2020, Rocklöv & Sjödin 2020, Simon 2020). There is higher  
331 probability of interpersonal contact due to overcrowding, difficulties in maintaining the social  
332 distance and contact tracing of the victims etc. Greater proportion of the elderly population can  
333 be another factor that enhances the severity of the disease in a community. The COVID-19 has  
334 been observed to be more fatal to the people of age group above 60 who are already having  
335 compromised immunity due to pulmonary or/and cardiovascular disorders (Chau et al. 2014,  
336 Fang et al. 2020, Kassir 2020). Therefore, communities with high population density and higher  
337 proportion of elderly people are more vulnerable to the epidemics.

338 Inaccessibility factors such as travel time to the cities and hospitals are other important  
339 determinants of higher vulnerability to diseases. Lack of access to health care systems due to  
340 poverty and need of longer travel time to the health centers greatly compromises the adaptive  
341 capacity of communities against epidemics (Olago et al. 2007, Kienberger & Hagenlocher  
342 2014). In line to these, our results revealed that municipal units across the entire higher  
343 mountain region of Nepal have higher vulnerability. The ability to prevent, detect, and respond  
344 to epidemics demand access to rapid and high-quality healthcare. Travel time negatively  
345 impacts healthcare-seeking behavior of local inhabitants (Ji et al. 2020, Rader et al. 2020).  
346 Rural municipalities across the mountain region are sparsely populated; therefore, chances of  
347 human-to-human transmission might be low. However, if the disease spreads, it can have high  
348 fatality due to inaccessibility to the health facilities to the illiterate and poor people therein.

349 Densely populated cities across Nepal and the districts of Province No. 2 are highly vulnerable.  
350 Higher level of pollution, lack of proper sanitation, illiteracy, overcrowding of people leading  
351 to failure in sustaining the interpersonal distance, lower public health related awareness among  
352 the people in those areas make the communities highly susceptible to epidemics. Improper  
353 waste disposal, unhygienic attitudes, deplorable sanitary conditions, poor knowledge of disease  
354 transmission mechanisms, unorthodox beliefs about epidemics, and ignorance on issues of  
355 health and healthy living contribute in higher severity of the epidemic (Ndah & Ngoran 2015).  
356 All eight districts of Province No 2 have much higher population density than rest of the  
357 districts of Nepal and more than half of the households lack toilet facilities.

358 The epidemiological vulnerability index (EVI) revealed that municipalities and rural  
359 municipalities that have higher poverty, lack of sanitation and population with higher frequency  
360 of respiratory and cardiovascular diseases (such as Dhulikhel, Tansen, Beshishahar,  
361 Sanphebagar, Amargadhi, etc.) are highly vulnerable to the epidemics. Urbanization and  
362 population density are not the sole causes of high COVID-19 infection rate, suburban areas  
363 with limited health and sanitation facilities are equally prone to the disease (Miller 2020). The  
364 rapidly urbanizing cities often bear fast growing unplanned settlements and lack basic  
365 infrastructure (Kienberger & Hagenlocher 2014), hence, suburban areas or growing cities  
366 become more vulnerable to epidemics. Among the eight municipal units belonging to the very  
367 high vulnerability group on EVI, seven are rapidly urbanizing municipalities (Beshishahar,  
368 Thulibheri, Bhimeswor, Dhulikhel, Dhorpatan, Tansen, Sanphebagar and Amargadhi in

369 decreasing order of severity) and one (Sarkegad RM in Humla district) is rural municipality.  
370 Further, data revealed that all of those municipal units have very high prevalence of either all  
371 or some of the diseases like asthma, diabetes, COPD and hypertension. Elderly people with  
372 comorbidities especially those with hypertension, pulmonary disorders, coronary heart disease  
373 or diabetes are more likely to be infected and account for a large proportion of deaths from  
374 COVID-19 (Fang et al. 2020, Yang et al. 2020, Zheng et al. 2020).

375 The SEVI gave more smoothed results because it is derived as the average of the SVI and EVI.  
376 It accounted all the demographic, socioeconomic and public health related indicators and  
377 predicted almost 40% of the population under high vulnerability group. The areas identified as  
378 the highly vulnerable to the epidemics are densely populated cities or growing cities with under  
379 developed infrastructure, higher prevalence of pulmonary and cardio-vascular disorders and  
380 inaccessibility to the health facilities. The communities having higher proportion of ethnic  
381 minorities living in poverty with low levels of educational attainment have higher rates of  
382 hospitalization and death related to COVID-19 than the others (Platt & Warwick 2020,  
383 Wadhera et al. 2020). As the SEVI has been obtained by combined processing of demographic,  
384 social and epidemiological indicators all together, the vulnerability results could be applicable  
385 to other epidemics too.

386 Most of the confirmed cases of COVID-19 in Nepal till date are among the travelers who  
387 returned back from abroad including India. Community level transmission has been observed  
388 only in a few pocket areas such as Birgunj, Udaypur, Nepalgunj etc. (Tharu et al. 2020). Early  
389 isolation of the people by means of the forcefully imposed lockdown, awareness programs and  
390 terror of disease among people helped in breaking the transmission chain. However, as the  
391 number of cases is increasing exponentially, although limited among the immigrants so far,  
392 there is a high risk of community transmission from asymptomatic carriers of the SARS-CoV-  
393 2. Currently, in the absence of good enough representative cases of COVID-19 community  
394 transmission, we couldn't test efficacies of the computed vulnerability indices. We believe that  
395 the vulnerability indices obtained by analyzing the demographic, socioeconomic and  
396 epidemiological indicators are valuable tools to the local and state governments for  
397 prioritization and improved planning especially in highly vulnerable communities where  
398 community level transmission can happen at any moment.

399 The quality of this assessment depends on the accuracy and completeness of the data used here.  
400 Specially, we suspect the completeness of epidemiological indicators as this information were  
401 derived from the OPD services. In addition, there might be other several factors needed to be  
402 considered in the commutation of COVID-19 related vulnerability index. For example, in the  
403 absence of organized data, we could not analyze the huge number of populations who are  
404 returning from COVID-19 affected countries like India, middle east Asian countries and  
405 Malaysia.

## 406 **5 | Conclusions**

407 We observed heterogeneity in the distribution of the community vulnerability to epidemics  
408 among the 753 municipalities and rural municipalities of Nepal. Most of the municipal units  
409 from Province No 2, Karnali and Sudoorpashchim provinces are highly vulnerable to the  
410 COVID-19. Additionally, some fast-growing cities with higher prevalence of pulmonary and  
411 cardiovascular disorders, lack of proper sanitation are vulnerable to the disease. Longer travel  
412 time required to access the health facilities makes the municipal units of mountain region more  
413 vulnerable than the rest. Such nature of the vulnerability emphasizes the need to address social  
414 determinants of health discrepancies and formulate management programs to deploy the  
415 resources efficiently to highly vulnerable communities.

## 416 **Acknowledgement**

417 We would like to thank Dr. Meghnath Dhimal, Nepal Health Research Council (NHRC) for  
418 his support. We acknowledge sources of data particularly, Health Management Information  
419 System (HMIS), Government of Nepal, Demographic and Health Survey (DHS) and  
420 Worldpop.

## 421 **Conflict of Interest**

422 The authors declare that they have no conflict of interests.

## 423 **Author contribution**

424 LK and BKA conceptualized the study. LK, BKA, BP gathered the data. LK and BKA analyzed  
425 the data and wrote the manuscript. All authors contributed in the manuscript improvement and  
426 approved it for the submission.

427

## 428 **References**

429 Acharya, B. K., Cao, C., Lakes, T., Chen, W., Naeem, S. and Pandit, S. 2018. Modeling the spatially  
430 varying risk factors of dengue fever in Jhapa district, Nepal, using the semi-parametric  
431 geographically weighted regression model. *International Journal of Biometeorology* **62**:1973-  
432 1986. <https://doi.org/10.1007/s00484-018-1601-8>.

433 Adger, W. N. 2006. Vulnerability. *Global Environmental Change* **16**:268-281.  
434 <https://doi.org/10.1016/j.gloenvcha.2006.02.006>.

435 Ahmed, F., Ahmed, N. e., Pissarides, C. and Stiglitz, J. 2020. Why inequality could spread COVID-19.  
436 *The Lancet Public Health* **5**:e240. [https://doi.org/10.1016/s2468-2667\(20\)30085-2](https://doi.org/10.1016/s2468-2667(20)30085-2).

437 Anderson, R. M., Heesterbeek, H., Klinkenberg, D. and Hollingsworth, T. D. 2020. How will country-  
438 based mitigation measures influence the course of the COVID-19 epidemic? *The Lancet*  
439 **395**:931-934. [https://doi.org/10.1016/s0140-6736\(20\)30567-5](https://doi.org/10.1016/s0140-6736(20)30567-5).

440 Anderson, R. M., Heesterbeek, H., Klinkenberg, D. and Hollingsworth, T. D. 2020. How will country-  
441 based mitigation measures influence the course of the COVID-19 epidemic? *The Lancet*  
442 **395**:931-934. [https://doi.org/10.1016/S0140-6736\(20\)30567-5](https://doi.org/10.1016/S0140-6736(20)30567-5).

443 Anselin, L., Syabri, I. and Kho, Y. 2006. GeoDa: An introduction to spatial data analysis. *Geographical*  
444 *Analysis* **38**:5-22.

445 Bates, I., Fenton, C., Gruber, J., Laloo, D., Lara, A. M., Squire, S. B., et al. 2004. Vulnerability to  
446 malaria, tuberculosis, and HIV/AIDS infection and disease. Part II: determinants operating at  
447 environmental and institutional level. *The Lancet Infectious Diseases* **4**:368-375.  
448 [https://doi.org/10.1016/s1473-3099\(04\)01047-3](https://doi.org/10.1016/s1473-3099(04)01047-3).

449 Baud, D., Qi, X., Nielsen-Saines, K., Musso, D., Pomar, L. and Favre, G. 2020. Real estimates of  
450 mortality following COVID-19 infection. *The Lancet Infectious Diseases*.  
451 [https://doi.org/10.1016/s1473-3099\(20\)30195-x](https://doi.org/10.1016/s1473-3099(20)30195-x).

452 Boe, D. M., Boule, L. A. and Kovacs, E. J. 2017. Innate immune responses in the ageing lung. *Clinical*  
453 *and Experimental Immunology* **187**:16-25. <https://doi.org/10.1111/cei.12881>.

454 Cannon, T. 1994. Vulnerability analysis and the explanation of 'Natural' disasters. In: A. Varley (Eds)  
455 *Disasters, Development and Environment*. Wiley London: 13-30.



- 456 Chau, P. H., Gusmano, M. K., Cheng, J. O., Cheung, S. H. and Woo, J. 2014. Social vulnerability index  
457 for the older people-Hong Kong and New York City as examples. *Journal of Urban Health*  
458 **91**:1048-1064. <https://doi.org/10.1007/s11524-014-9901-8>.
- 459 Coccia, M. 2020. Factors determining the diffusion of COVID-19 and suggested strategy to prevent  
460 future accelerated viral infectivity similar to COVID. *Science of the Total Environment*  
461 **729**:138474. <https://doi.org/10.1016/j.scitotenv.2020.138474>.
- 462 DeCapprio, D., Burgess, T., Gartner, J., McCall, C. J., Sayed, S. and Kothari, S. 2020. Building a  
463 COVID-19 Vulnerability Index [Preprint]. arXiv:2003.07347.
- 464 Dickin, S. K., Schuster-Wallace, C. J. and Elliott, S. J. 2013. Developing a vulnerability mapping  
465 methodology: applying the water-associated disease index to dengue in Malaysia. *PLoS One*  
466 **8**:e63584. <https://doi.org/10.1371/journal.pone.0063584>.
- 467 Dong, Y., Mo, X., Hu, Y., Qi, X., Jiang, F., Jiang, Z., et al. 2020. Epidemiology of COVID-19 among  
468 children in China. *Pediatrics* **145**:e20200702. <https://doi.org/10.1542/peds.2020-0702>.
- 469 Fang, L., Karakiulakis, G. and Roth, M. 2020. Are patients with hypertension and diabetes mellitus at  
470 increased risk for COVID-19 infection? *The Lancet Respiratory Medicine* **8**:e21.  
471 [https://doi.org/10.1016/s2213-2600\(20\)30116-8](https://doi.org/10.1016/s2213-2600(20)30116-8).
- 472 Frankel, L. K. 2011. The relation of life insurance to public hygiene. 1910. *American Journal of Public*  
473 *Health* **101**:1868-1869. <https://doi.org/10.2105/ajph.2011.101101868>.
- 474 Huang, C., Wang, Y., Li, X., Ren, L., Zhao, J., Hu, Y., et al. 2020. Clinical features of patients infected  
475 with 2019 novel coronavirus in Wuhan, China. *The Lancet* **395**:497-506.  
476 [https://doi.org/10.1016/s0140-6736\(20\)30183-5](https://doi.org/10.1016/s0140-6736(20)30183-5).
- 477 Jenks, G. 1977. *Optimal data classification for choropleth maps Occasional (No. 2)*. University 152 of  
478 Kansas, Department of Geography.
- 479 Ji, Y., Ma, Z., Peppelenbosch, M. P. and Pan, Q. 2020. Potential association between COVID-19  
480 mortality and health-care resource availability. *The Lancet Global Health* **8**:e480.  
481 [https://doi.org/10.1016/s2214-109x\(20\)30068-1](https://doi.org/10.1016/s2214-109x(20)30068-1).
- 482 Kamel Boulos, M. N. and Geraghty, E. M. 2020. Geographical tracking and mapping of coronavirus  
483 disease COVID-19/severe acute respiratory syndrome coronavirus 2 (SARS-CoV-2) epidemic  
484 and associated events around the world: how 21st century GIS technologies are supporting the  
485 global fight against outbreaks and epidemics. *International Journal of Health Geography* **19**:8.  
486 <https://doi.org/10.1186/s12942-020-00202-8>.
- 487 Kang, D., Choi, H., Kim, J. H. and Choi, J. 2020. Spatial epidemic dynamics of the COVID-19 outbreak  
488 in China. *International Journal of Infectious Diseases* **94**:96-102.  
489 <https://doi.org/10.1016/j.ijid.2020.03.076>.
- 490 Kassir, R. 2020. Risk of COVID-19 for patients with obesity. *Obesity Reviews* **21**:e13034.  
491 <https://doi.org/10.1111/obr.13034>.
- 492 KC, S., Mishra, R., Mishra, R. and Shukla, A. 2020. Community COVID-19 vulnerability index in  
493 India. Laxenburg, Austria, IIASA Working Paper.

- 494 Kienberger, S. and Hagenlocher, M. 2014. Spatial-explicit modeling of social vulnerability to malaria  
495 in East Africa. *International Journal of Health Geographics* **13**:29.
- 496 Liu, Y., Gayle, A. A., Wilder-Smith, A. and Rocklöv, J. 2020. The reproductive number of COVID-19  
497 is higher compared to SARS coronavirus. *Journal of Travel Medicine* **27**.  
498 <https://doi.org/10.1093/jtm/taaa021>.
- 499 Macharia, P. M., Joseph, N. K. and Okiro, E. A. 2020. A vulnerability index for COVID-19: spatial  
500 analysis to inform equitable response in Kenya [Preprint]. medRxiv.  
501 <https://doi.org/10.1101/2020.05.27.20113803>.
- 502 Mayala, B. K., Trinadh Dontamsetti, T. D. F. and C., T. N. 2019. *Interpolation of DHS Survey Data at*  
503 *Subnational Administrative Level 2*. DHS Spatial Analysis Reports No. 17.
- 504 Miller, J. 2020. The overstated COVID-19 blame on urban density in favor of suburban living. Forbes,  
505 14th May 2020. <https://www.forbes.com/sites>.
- 506 MoHP, G. o. N. 2020. Ministry of health and population, government of Nepal. Retrieved 18th June  
507 2020, from <https://covid19.mohp.gov.np/#/>.
- 508 Mollalo, A., Vahedi, B. and Rivera, K. M. 2020. GIS-based spatial modeling of COVID-19 incidence  
509 rate in the continental United States. *Science of the Total Environment* **728**:138884.  
510 <https://doi.org/10.1016/j.scitotenv.2020.138884>.
- 511 Mwarumba, N. 2017. Global social vulnerability to pandemics: An examination of social determinants  
512 of H1N1 2009 mortality. PhD Thesis, Oklahoma State University, Oklahoma. Pp:150.
- 513 Ndah, A. B. and Ngoran, S. D. 2015. Liaising Water Resources Consumption, Urban Sanitation and  
514 Cholera Epidemics in Douala, Cameroon: A Community Vulnerability Assessment. *Journal of*  
515 *Resources Development and Management* **8**:63-78.
- 516 Olago, D., Marshall, M., Wandiga, S. O., Opondo, M., Yanda, P. Z., Kangalawe, R., et al. 2007.  
517 Assessment of the potential of ecolabels to promote agrobiodiversity. *Ambio* **36**:551-558.  
518 [https://doi.org/10.1579/0044-7447\(2007\)36\[551:aotpoe\]2.0.co;2](https://doi.org/10.1579/0044-7447(2007)36[551:aotpoe]2.0.co;2).
- 519 Platt, L. and Warwick, R. 2020. Are some ethnic groups more vulnerable to COVID-19 than others?  
520 The Institute for Fiscal Studies, Nuffield Foundation.
- 521 Pringle, D. G. 1996. Mapping disease risk estimates based on small numbers: An assessment of  
522 empirical Bayes techniques. *Economic & Social Review* **27**:341–363.
- 523 Rader, B., Astley, C. M., Sy, K. T. L., Sewalk, K., Hswen, Y., Brownstein, J. S., et al. 2020. Geographic  
524 access to United States SARS-CoV-2 testing sites highlights healthcare disparities and may  
525 bias transmission estimates. *Journal of Travel Medicine*. <https://doi.org/10.1093/jtm/taaa076>.
- 526 Rader, B., Astley, C. M., Sy, K. T. L., Sewalk, K., Hswen, Y., Brownstein, J. S., et al. 2020. Increased  
527 travel times to United States SARS-CoV-2 testing sites: A spatial modeling study [Preprint].  
528 *Epidemiology*. <https://doi.org/10.1101/2020.04.25.20074419>.
- 529 Ray, N. and Ebener, S. 2008. AccessMod 3.0: computing geographic coverage and accessibility to  
530 health care services using anisotropic movement of patients. *International Journal of Health*  
531 *Geographics* **7**:63. <https://doi.org/10.1186/1476-072X-7-63>.

- 532 Rocklöv, J. and Sjödin, H. 2020. High population densities catalyse the spread of COVID-19. *Journal*  
533 *of Travel Medicine* **27**:taaa038. <https://doi.org/10.1093/jtm/taaa038>.
- 534 Rothan, H. A. and Byrareddy, S. N. 2020. The epidemiology and pathogenesis of coronavirus disease  
535 (COVID-19) outbreak. *Journal of Autoimmunity* **109**:102433.  
536 <https://doi.org/10.1016/j.jaut.2020.102433>.
- 537 Sarwar, S., Waheed, R., Sarwar, S. and Khan, A. 2020. COVID-19 challenges to Pakistan: Is GIS  
538 analysis useful to draw solutions? *Science of the Total Environment* **730**:139089.  
539 <https://doi.org/10.1016/j.scitotenv.2020.139089>.
- 540 Semenza, J. C. and Giesecke, J. 2008. Intervening to reduce inequalities in infections in Europe.  
541 *American Journal of Public Health* **98**:787-792. <https://doi.org/10.2105/AJPH.2007.120329>.
- 542 Simon, D. 2020. Cities are at centre of coronavirus pandemic - understanding this can help build a  
543 sustainable, equal future. *The Conversation*, 23 April 2020. <https://theconversation.com>.
- 544 Smith, J. A. and Judd, J. 2020. COVID-19: Vulnerability and the power of privilege in a pandemic.  
545 *Health Promotion Journal of Australia* **31**:158-160. <https://doi.org/10.1002/hpja.333>.
- 546 Sominsky, L., Walker, D. W. and Spencer, S. J. 2020. One size does not fit all - Patterns of vulnerability  
547 and resilience in the COVID-19 pandemic and why heterogeneity of disease matters. *Brain,*  
548 *Behavior, and Immunity*. <https://doi.org/10.1016/j.bbi.2020.03.016>.
- 549 Sullivan, C. A. and Meigh, J. 2006. Integration of the biophysical and social sciences using an indicator  
550 approach: Addressing water problems at different scales. *Water Resources Management*  
551 **21**:111-128. <https://doi.org/10.1007/s11269-006-9044-0>.
- 552 Tharu, T., Gahatraj, R., Shahi, M. and Gautam, G. 2020. Community transmission of COVID-19 in  
553 Nepalgunj city, Nepal (in Nepali language). *Kantipur National Daily*, 4th May 2020  
554 <http://www.ekantipur.com>.
- 555 Tuite, A., Ng, V., Rees, E. and Fisman, D. 2020. Estimation of COVID-19 outbreak size in Italy based  
556 on international case exportations [Preprint]. medRxiv 20030049.  
557 <https://doi.org/10.1101/2020.03.02.20030049>.
- 558 Uddin, K., Shrestha, H. L., Murthy, M. S., Bajracharya, B., Shrestha, B., Gilani, H., et al. 2015.  
559 Development of 2010 national land cover database for the Nepal. *Journal of Environmental*  
560 *Management* **148**:82-90. <https://doi.org/10.1016/j.jenvman.2014.07.047>.
- 561 Wadhera, R. K., PriyaWadhera, Gaba, P., Figueroa, J. F., Maddox, K. E. J., Yeh, R., et al. 2020.  
562 Variation in COVID-19 hospitalizations and deaths across New York city boroughs. *JAMA*  
563 **323**:2194-2195. <https://doi.org/10.1001/jama.2020.6887>.
- 564 Weiss, D. J., Nelson, A., Gibson, H. S., Temperley, W., Peedell, S., Lieber, A., et al. 2018. A global  
565 map of travel time to cities to assess inequalities in accessibility in 2015. *Nature* **553**:333-336.  
566 <https://doi.org/10.1038/nature25181>.
- 567 WHO. 2020a. Report of the World Health Organization-China Joint Mission on Coronavirus Disease  
568 2019 (COVID-19). Retrieved from: [https://www.who.int/docs/default-](https://www.who.int/docs/default-source/coronaviruse/who-china-joint-mission-on-covid-19-final-report.pdf)  
569 [source/coronaviruse/who-china-joint-mission-on-covid-19-final-report.pdf](https://www.who.int/docs/default-source/coronaviruse/who-china-joint-mission-on-covid-19-final-report.pdf).

- 570 WHO. 2020b. Coronavirus Disease 2019 (COVID-19) Situation Report - 157. World Health  
571 Organization. Retrieved from: [https://www.who.int/docs/default-](https://www.who.int/docs/default-source/coronaviruse/situation-reports/20200625-covid-19-sitrep-157.pdf?sfvrsn=423f4a82_2)  
572 [source/coronaviruse/situation-reports/20200625-covid-19-sitrep-157.pdf?sfvrsn=423f4a82\\_2](https://www.who.int/docs/default-source/coronaviruse/situation-reports/20200625-covid-19-sitrep-157.pdf?sfvrsn=423f4a82_2).
- 573 Wu, Z. and McGoogan, J. M. 2020. Characteristics of and important lessons from the coronavirus  
574 disease 2019 (COVID-19) outbreak in China summary of a report of 72314 cases from the  
575 Chinese Center for Disease Control and Prevention. *JAMA* **323**:1239-1242.  
576 <https://doi.org/10.1001/jama.2020.2648>.
- 577 Yang, Y., Peng, F., Wang, R., Guan, K., Jiang, T., Xu, G., et al. 2020. The deadly coronaviruses: The  
578 2003 SARS pandemic and the 2020 novel coronavirus epidemic in China. *Journal of*  
579 *Autoimmunity* **109**:102434. <https://doi.org/10.1016/j.jaut.2020.102434>.
- 580 You, D., Lindt, N., Allen, R., Hansen, C., Beise, J. and Blume, S. 2020. Migrant and displaced children  
581 in the age of COVID-19: How the pandemic is impacting them and what we can do to help.  
582 *Migration Policy Practice* **X**:32-39.
- 583 Zheng, Y. Y., Ma, Y. T., Zhang, J. Y. and Xie, X. 2020. COVID-19 and the cardiovascular system.  
584 *Nature Reviews Cardiology* **17**:259-260. <https://doi.org/10.1038/s41569-020-0360-5>.
